# Supplementary material
Source: PubMed Central journal article supplement (PMC1360536)
Supplement: pnas_0507720103_8.pdf [file pnas_0507720103_8.pdf]

**Table 1. Physical parameters**

| Parameter             | Name                                                          | Typical value                   | Source                                          |
|-----------------------|---------------------------------------------------------------|---------------------------------|-------------------------------------------------|
| $v$                   | Velocity of bacteria                                          | 0.045 $\mu\text{m}/\text{sec}$  | Experiment                                      |
| $D_x$                 | x diffusion                                                   | 0.04 $\mu\text{m}^2/\text{sec}$ | Experiment                                      |
| $D_y$                 | y diffusion                                                   | 0.25 $\mu\text{m}^2/\text{sec}$ | Experiment                                      |
| $D_\phi$              | Phase diffusion                                               | $<10^{-5} \text{sec}^{-1}$      | Must be small to produce the waves              |
| $\rho$                | Average 2D density of bacteria                                | 0.25 $\mu\text{m}^{-2}$         | Experiment                                      |
| $\tau_v, \tau_\theta$ | Correlation time                                              | 100 sec                         | Not important, can vary over a wide range       |
| $K_1, \dots, K_6$     | Michaelis–Menten parameters                                   | 0.005                           | Determined by fitting the experimental data     |
| $V_1$                 |                                                               | 0.0015                          |                                                 |
| $V_{m2}$              |                                                               | 0.015                           |                                                 |
| $V_{m3}, V_{m5}$      |                                                               | 0.06                            |                                                 |
| $V_4, V_6$            |                                                               | 0.03                            |                                                 |
| $\omega$              | Phase velocity (simple clock model)                           | 0.0018 rad/sec                  | Selected to fit Frizilator frequency            |
| $\phi_R$              | Length of the refractory period (simple clock model)          | $0.2 \cdot \pi \text{ rad}$     | Must be $(0.1-0.5)\pi$ to produce the waves     |
| $p$                   | Sensitivity to signaling (simple clock and Frizilator models) | $0.06 \text{ sec}^{-1}$         | To produce waves, must be $(0.03-0.1)$          |
| $R$                   | Interaction cross-section (windshield model)                  | 1 $\mu\text{m}$                 | $\approx 2d$ , $d$ = diameter of bacterial body |
| $R_x, R_y$            | Interaction distances (box model)                             | 0.75 $\mu\text{m}$              | $\approx R$                                     |
