# Supplementary material
Source: PubMed Central journal article supplement (PMC1360536)
Supplement: pnas_0507720103_9.pdf [file pnas_0507720103_9.pdf]

**Table 2. Model variables**

| Parameter  | Name                       | Typical value                                          |
|------------|----------------------------|--------------------------------------------------------|
| $x_{\max}$ | $x$ size of the field      | 800 $\mu\text{m}$                                      |
| $y_{\max}$ | $y$ size of the field      | 400 $\mu\text{m}$                                      |
| $N$        | No. of bacteria            | $8 \times 10^4 = \rho \times x_{\max} \times y_{\max}$ |
| $dx$       | $x$ discretization step    | <0.3 $\mu\text{m}$                                     |
| $dy$       | $y$ discretization step    | <0.3 $\mu\text{m}$                                     |
| $h$        | Time step                  | 3 sec                                                  |
| $t_{\max}$ | Time length of the process | $2 \times 10^4$ sec                                    |
