# Supplementary material
Source: PubMed Central journal article supplement (PMC1360536)

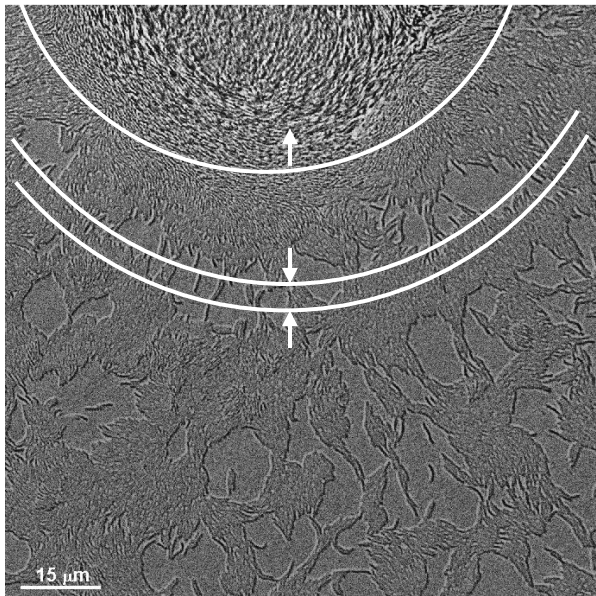

Supplement: pnas_0507720103_1.pdf [file pnas_0507720103_1.pdf]

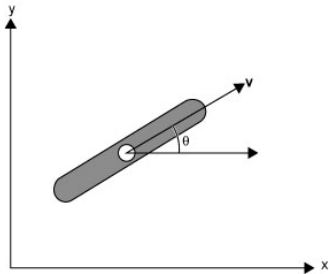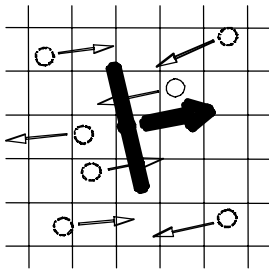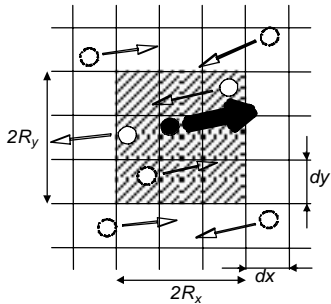

Supplement: pnas_0507720103_2.pdf [file pnas_0507720103_2.pdf]

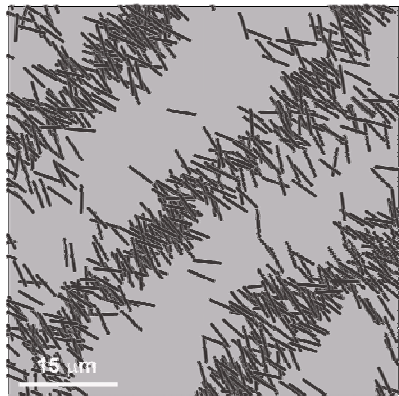

**(a)**

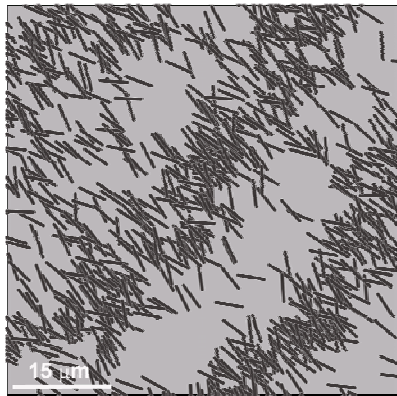

**(b)**

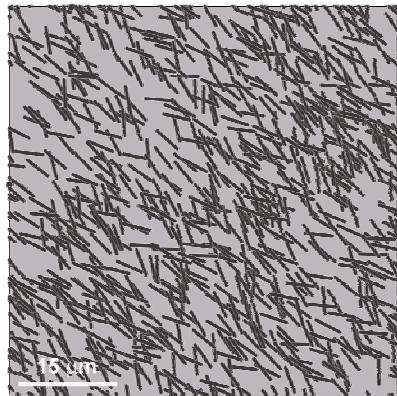

**(c)**

Supplement: pnas_0507720103_3.pdf [file pnas_0507720103_3.pdf]

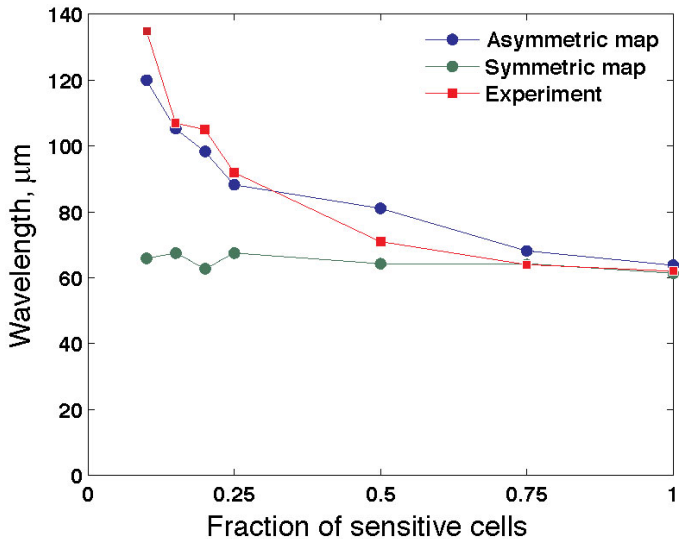

Supplement: pnas_0507720103_4.pdf [file pnas_0507720103_4.pdf]

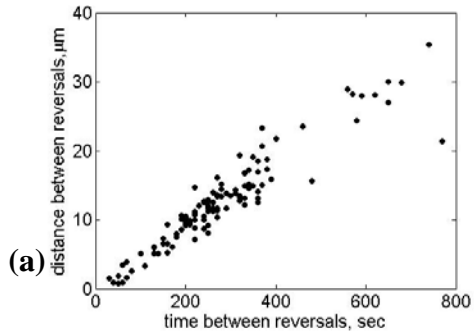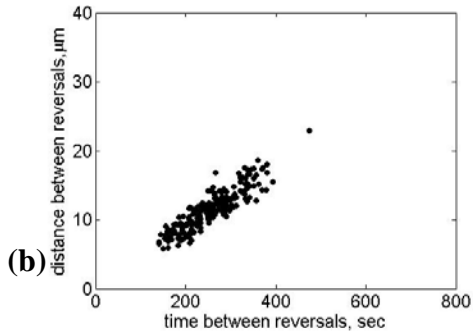

Supplement: pnas_0507720103_5.pdf [file pnas_0507720103_5.pdf]

**(a)**

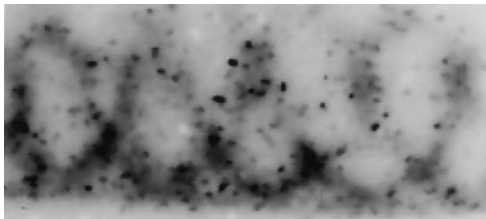

**(b)**

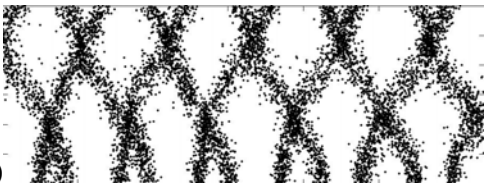

**(c)**

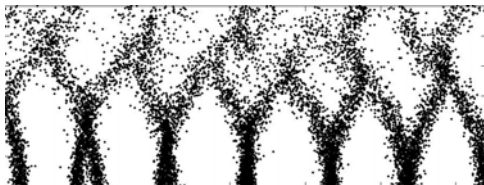

**(d)**

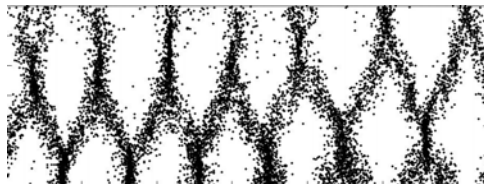

**(e)**

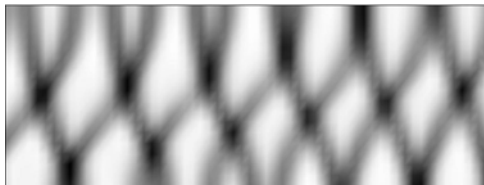

Supplement: pnas_0507720103_6.pdf [file pnas_0507720103_6.pdf]

**(a)**

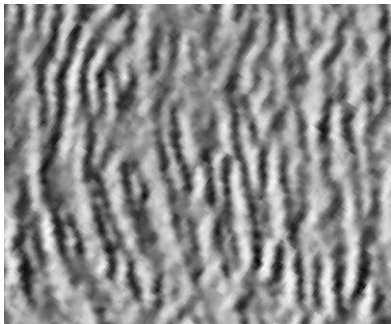

**(b)**

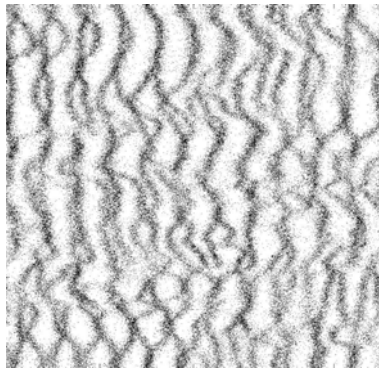

**(c)**

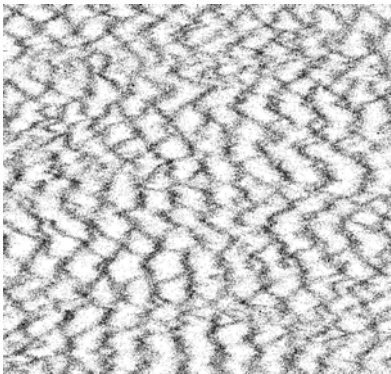

**(d)**

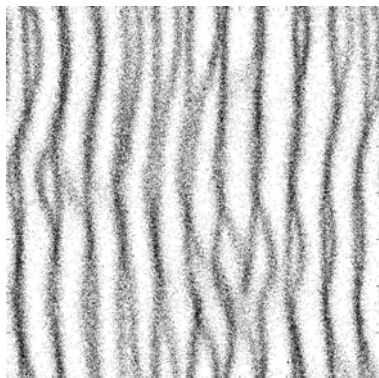

Supplement: pnas_0507720103_7.pdf [file pnas_0507720103_7.pdf]
